# Supplementary material
Source: PubMed Central journal article supplement (PMC4372754)
Supplement: JB.02566-14_zjb999093555so1.pdf [file JB.02566-14_zjb999093555so1.pdf]

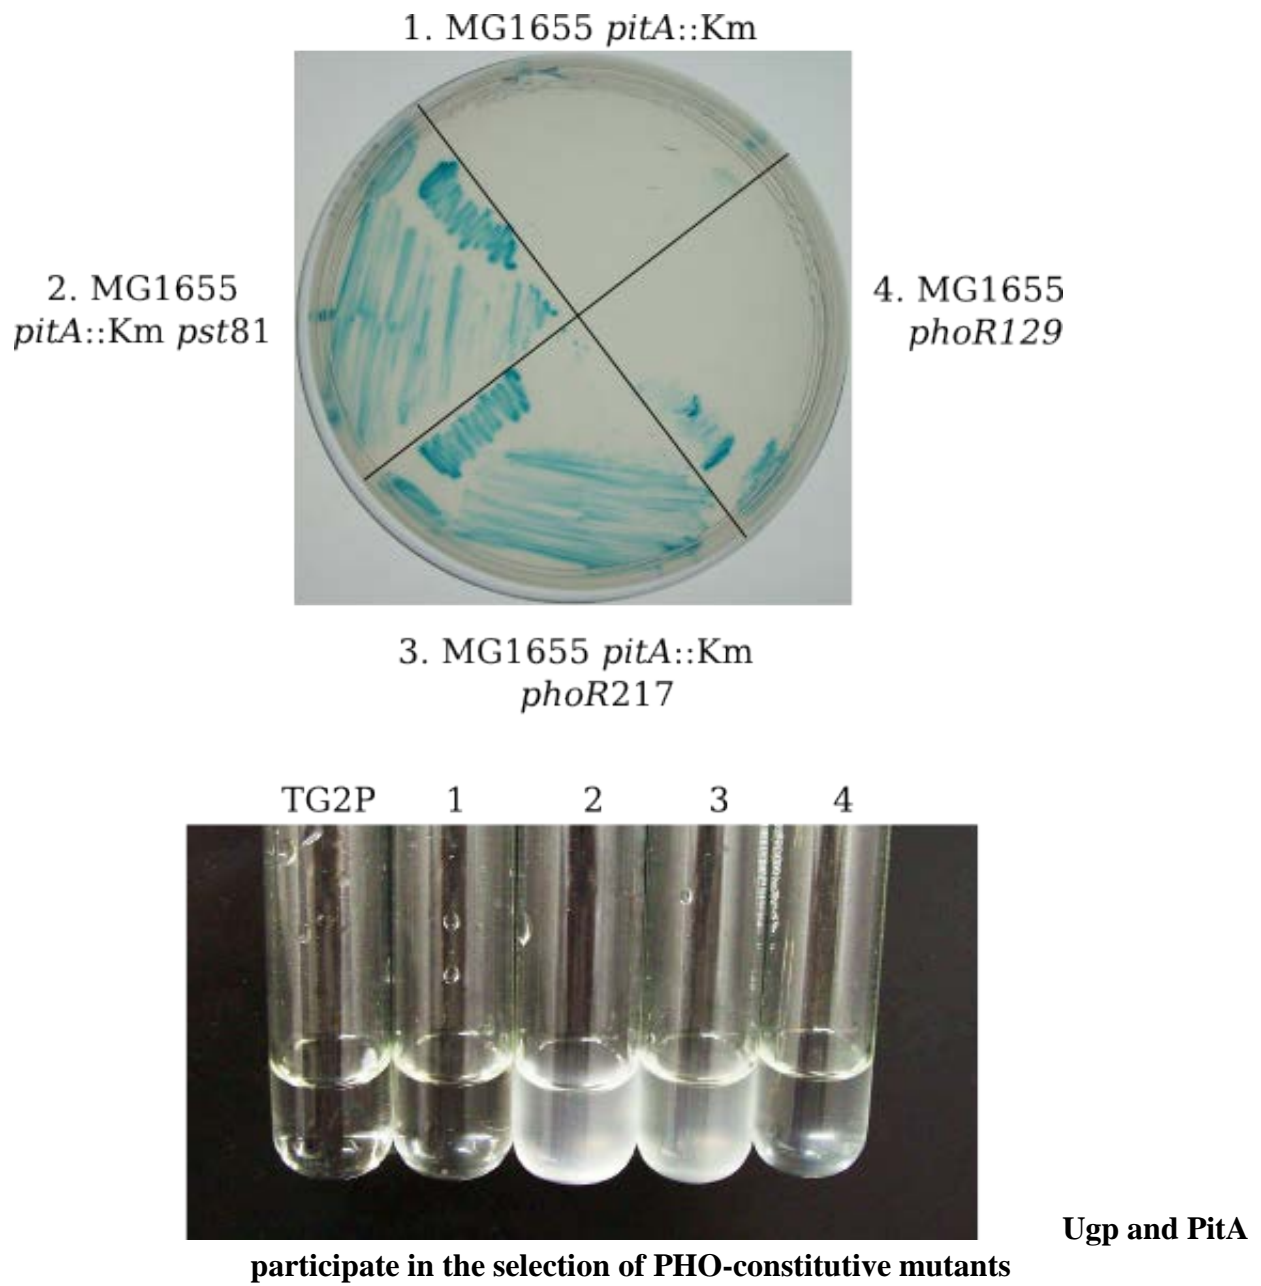

Figure S1.

The following derivatives of MG1655 were grown in TG2P: 1. *pitA::Km* (strain EG2); 2. *pitA::Km pst81* (strain RI81); 3. *pitA::Km phoR217* (strain RI65) and 4. *phoR129* (strain TP01).

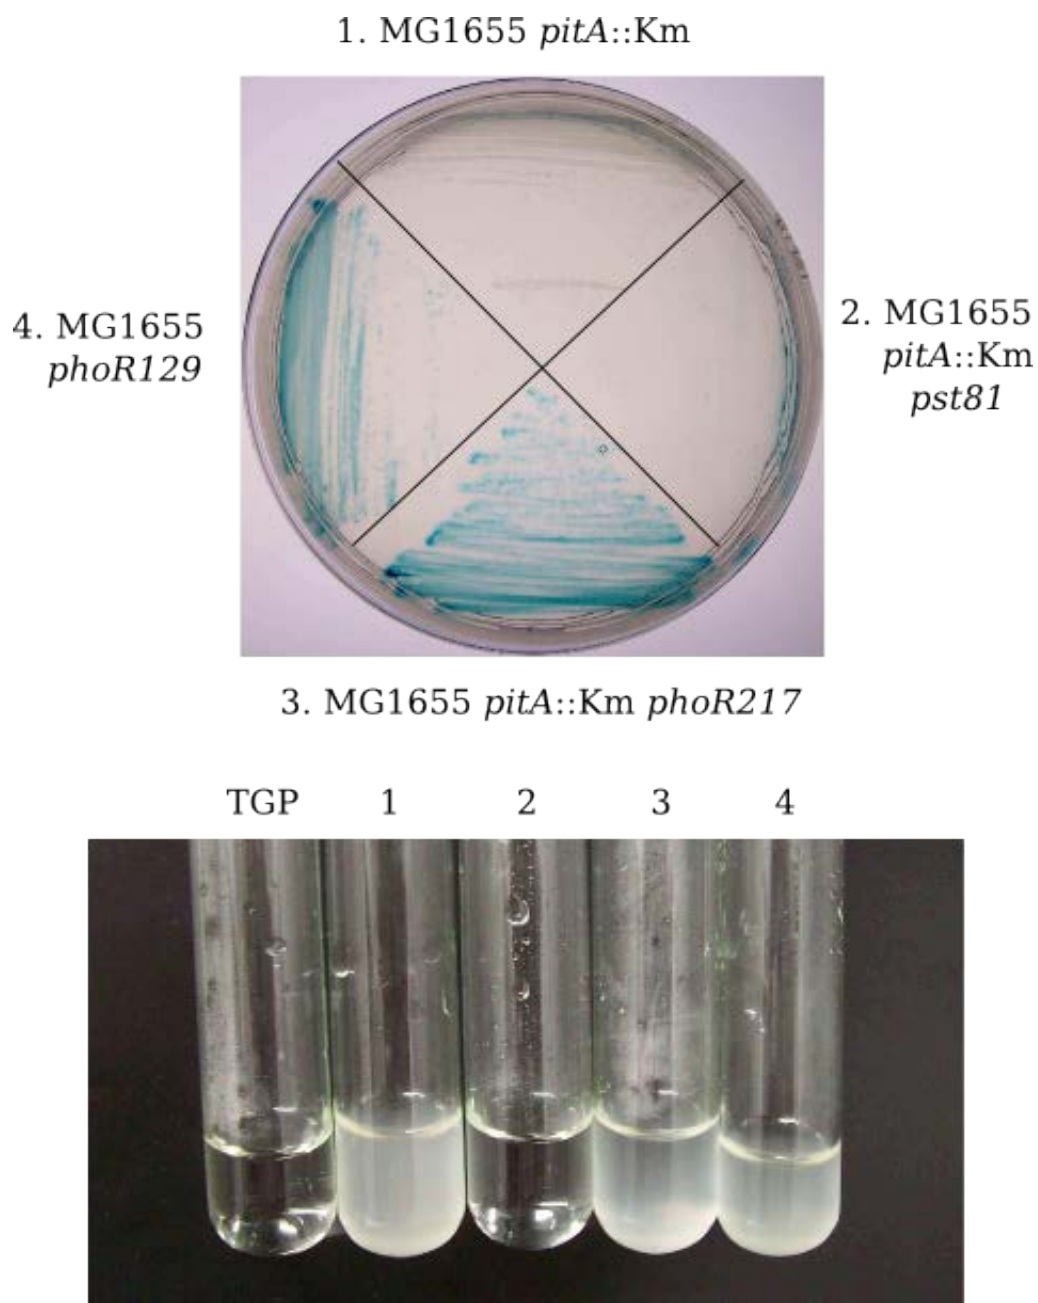

Figure S2.

The following derivatives of MG1655 were grown in TGP: 1. *pitA::Km* (strain EG2); 2. *pitA::Km pst81* (strain RI81); 3. *pitA::Km phoR217* (strain RI65) and 4. *phoR129* (strain TP01).

```

PhoR      210  NMSHELRTPLTVLQGYLEMNEQPLEGAVREKALHTMREQTQRMGLVKQLLTLSKI EAA 269
EnvZ      240  GVSHDLRTPLTRI RLATEMMSEQ - DGYLAESI NKDI EECNAI I EQFI DYLRGTGQEMPME 297
          .***:***** ::   **.*  :* : * . : :.* . :* :. * * .::

```

Figure S3.  
 CLUSTAL 2.1 sequence alignment between PhoR and EnvZ. The conserved residue Thr247 (EnvZ)/  
 Thr217 (PhoR) is surrounded by a red square.
